# Supplementary material for: Inhibition of Smurf2 translation by miR-322/503 modulates TGF-β/Smad2 signaling and intestinal epithelial homeostasis
Source: PubMed Central journal article supplement — Mol Biol Cell. 2014 Apr 15;25(8):1234–43. doi: 10.1091/mbc.E13-09-0560 (PMC3982989; doi:10.1091/mbc.e13-09-0560), 2014-04-15
Supplement: supp_E13-09-0560v1_CombinedSupMats.pdf [file supp_E13-09-0560v1_CombinedSupMats.pdf]

# Supplemental Materials

*Molecular Biology of the Cell*

Cao et al.

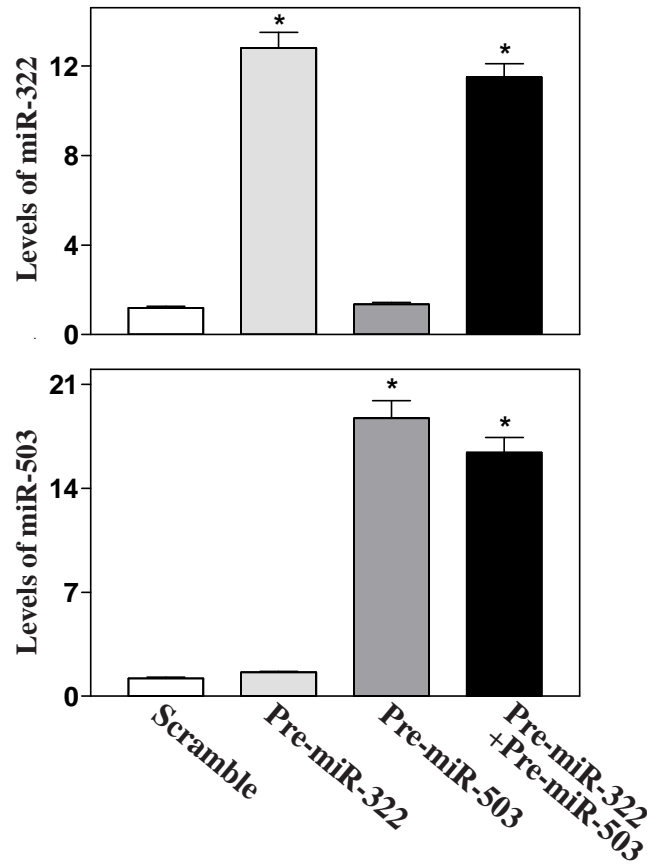

**Supplementary Figure 1:** Changes in the levels of miR-322 (*top*) and miR-503 (*bottom*) after co-transfection with pre-miR-322 and pre-miR-503. Forty-eight hours after cotransfecting cells with pre-miR-322 and pre-miR-503, the levels of miR-322 and miR-503 were measured by Q-PCR analysis. Values are means  $\pm$  SEM from three separate experiments. \*  $P < 0.05$  compared with scrambled oligo.

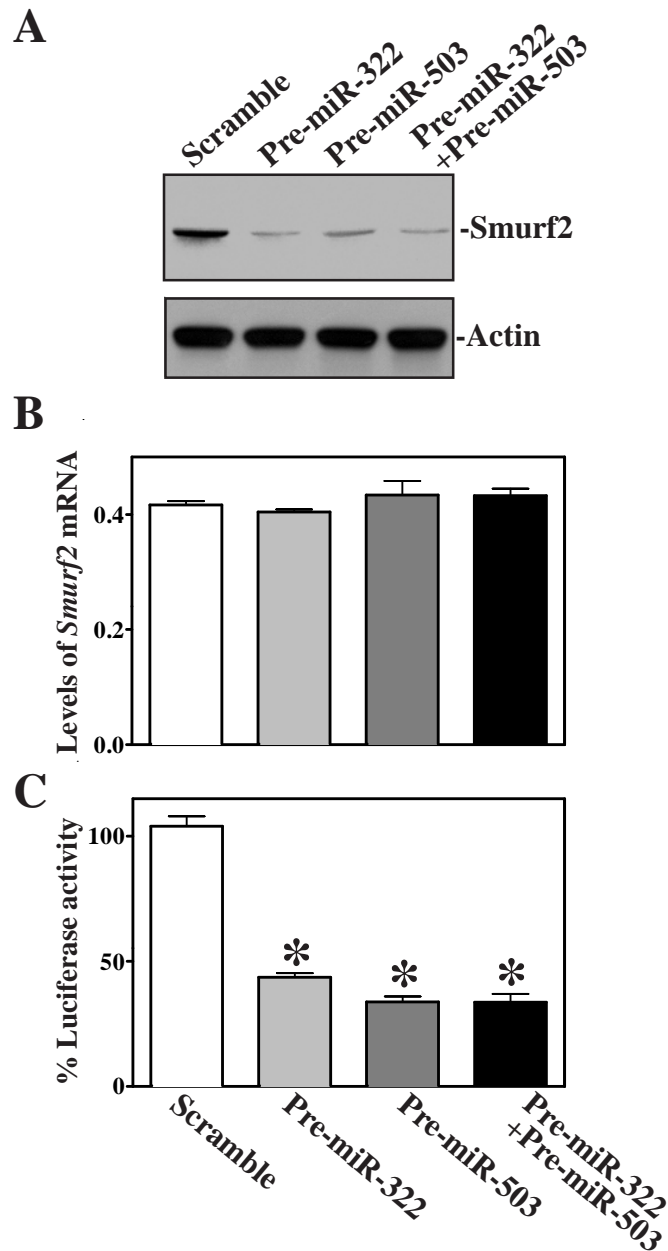

**Supplementary Figure 2.** Effect of increased levels of both miR-322 and miR-503 on *Smurf2* expression. (A) Forty-eight h after co-transfection with pre-miR-322 and pre-miR-503, the expression of *Smurf2* in cells was measured by immunoblot analysis. (B) Levels of *Smurf2* mRNA as examined by Q-PCR analysis in cells described in (A). (C) Levels of reporter activities after ectopic overexpression of both miR-322 and miR-503. The results are expressed as the means  $\pm$  SEM data from three separate experiments. \*  $P < 0.05$  compared with cells transfected with scrambled RNA.

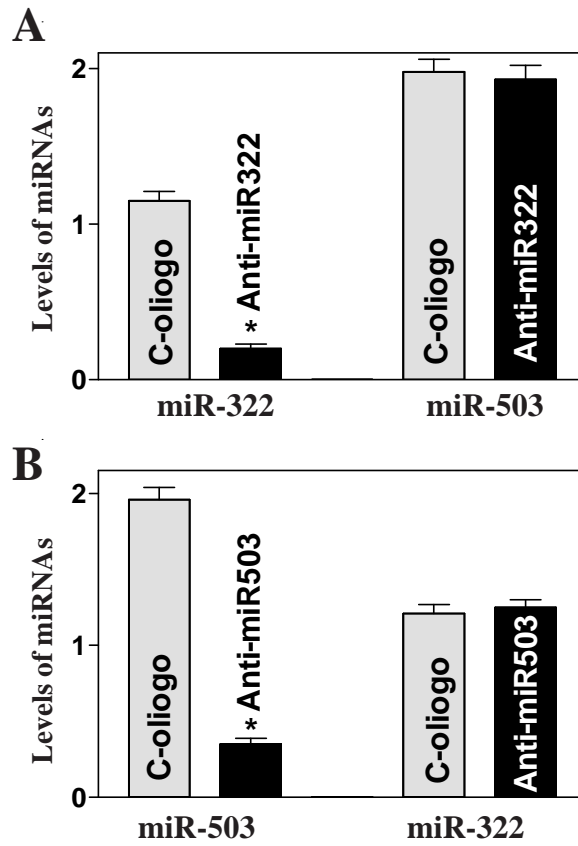

**Supplementary Figure 3:** Changes in miR-322/503 levels in cells transfected with anti-miR-322 or anti-miR-503 oligomers. After transfecting IECs with anti-miR-322 oligomers (**A**) or with anti-miR-503 (**B**) for 48 h, levels of miR-322/503 were measured by Q-PCR analysis. Values are means  $\pm$  SEM from three separate experiments. \*  $P < 0.05$  compared with cells transfected with control oligo (C-oligo).

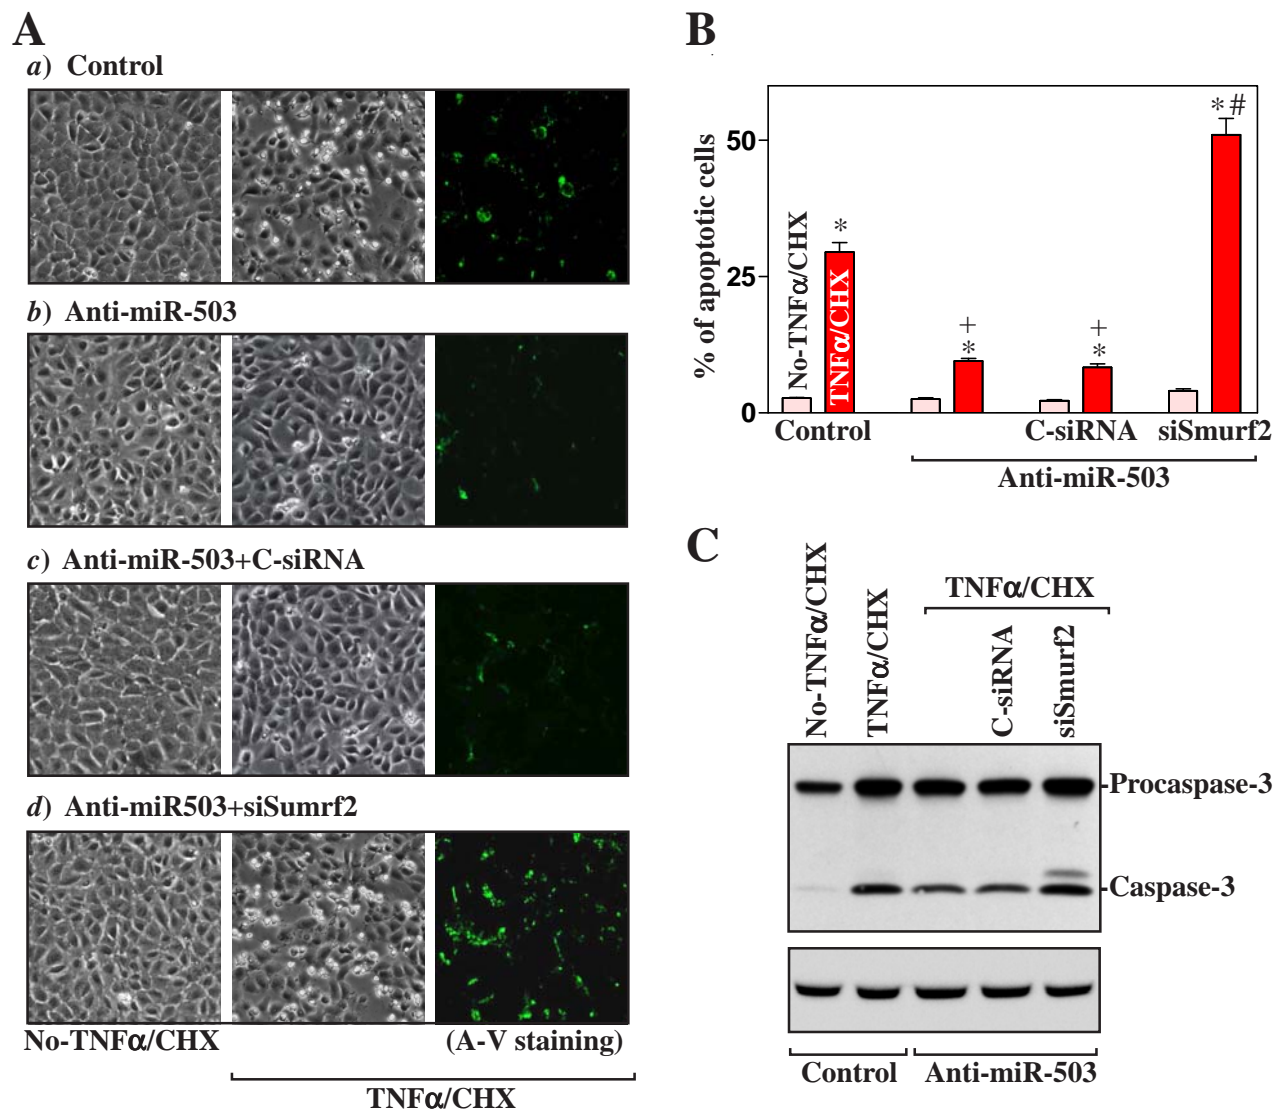

**Supplementary Figure 4.** Increased levels of endogenous Smurf2 by miR-503 silencing protect IECs against apoptosis. (A) TNF- $\alpha$ /CHX-induced apoptosis after various treatments. Forty-eight hours after transfecting cells with anti-miR-503 or control oligo (Control), cells were treated with TNF- $\alpha$ /CHX for 4 followed by measurement of apoptosis. Original magnification  $\times 150$ . (B) Percentages of apoptotic cells after different treatments as described in (A). Values are means  $\pm$  SEM of data from 3 experiments. \*  $P < 0.05$  compared with cells untreated with TNF- $\alpha$ /CHX; +  $P < 0.05$  compared with control cells exposed to TNF- $\alpha$ /CHX; #  $P < 0.05$  compared with cells co-transfected with anti-miR-503 and C-siRNA and then exposed to TNF- $\alpha$ /CHX. (C) Changes in levels of caspase-3 in cells described in (A).

**Supplemental Table 1. Alignment of the Smurf2 sequences with miR-322/503**

|                             |                               |         |
|-----------------------------|-------------------------------|---------|
| Binding site 1<br>3721-3774 | AGGUUUUG--UACUUAACGACGAC      | miR-322 |
|                             | :                             |         |
|                             | CATCAGAACAATGCACTGTTGTTT      | Smurf2  |
|                             | :                             |         |
|                             | GACGUCAUGACAAG-GGCGACGAU      | miR-503 |
| Binding site 2<br>3974-3998 | AGGUU----UUGUA---CUUAACGACGAC | miR-322 |
|                             |                               |         |
|                             | TGCAGTG—GTATCGAGATGCTGCTT     | Smurf2  |
|                             |                               |         |
|                             | GACGUCAUGACAAGG-----CGACGAU   | miR-503 |
| Binding site 3<br>4919-4921 | AGGUU-UUGUACUUAACGACGAC       | miR-322 |
|                             |                               |         |
|                             | GAGCAATAAAATGAAT---GCTGTTT    | Smurf2  |
|                             |                               |         |
|                             | GACGUCAUGACAAGGGCGACGAU       | miR-503 |

**Supplemental Table-2: Primers for Smurf2 luciferase reporter**

| name                                 | sequence                                         |
|--------------------------------------|--------------------------------------------------|
| Smurf2 CR sense                      | <i>GCTAGCGCCTGACAGTACTCTGTGCAA</i>               |
| Smurf2 CR anti-sense                 | <i>GTCGACACTCCACAGCAAAGCCACA</i>                 |
| Smurf2 3'UTR sense                   | <i>GCTAGCCGCTGGAGTACAGGACAACA</i>                |
| Smurf2 3'UTR anti-sense              | <i>GTCGACTTGTGACAGTGCAAACAGCA</i>                |
| Smurf2 3' UTR-F1 sense               | <i>GCTAGCAGGACTCACCCACAGCTCTT</i>                |
| Smurf2 3' UTR-F1 anti-sense          | <i>GTCGACTAGCTCAGGCTGGCCTTAAA</i>                |
| Smurf2 3' UTR-F2 sense               | <i>GCTAGCTGAAACTGAGGAGTTCGTGAGA</i>              |
| Smurf2 3' UTR-F2 anti-sense          | <i>GTCGACGATGGGATTACGGGTGTCAG</i>                |
| Smurf2 3' UTR-F3 sense               | <i>GCTAGCGGCAGAAGGATCAGCAAGTC</i>                |
| Smurf2 3' UTR-F3 anti-sense          | <i>GTCGACAGGCAAGTCCAGGTTCTGTG</i>                |
| Smurf2 3' UTR-F4 sense               | <i>GCTAGCCATTTACAGGCCAGAGCACA</i>                |
| Smurf2 3' UTR-F4 anti-sense          | <i>GTCGACTTGTGACAGTGCAAACAGCA</i>                |
| Smurf2 3' UTR-F3 mutation sense      | CAGGGATGCAGTGGTATCGAAATACTACTTGCAGTGGTTTTCCGTGC  |
| Smurf2 3' UTR-F3 mutation anti-sense | GCACGGAAAACCACTGCAAGTAGTATTTTCGATACCACTGCATCCCTG |
